# Supplementary material for: Vibrational perturbations in the spectra of N-substituted polycyclic aromatic heterocycles revealed by rotational analysis
Source: Royal Society of Chemistry journal article supplement (doi:10.1039/d4cp04769a), 2025-01-01
Supplement: d4cp04769a2.pdf [file d4cp04769a2.pdf]

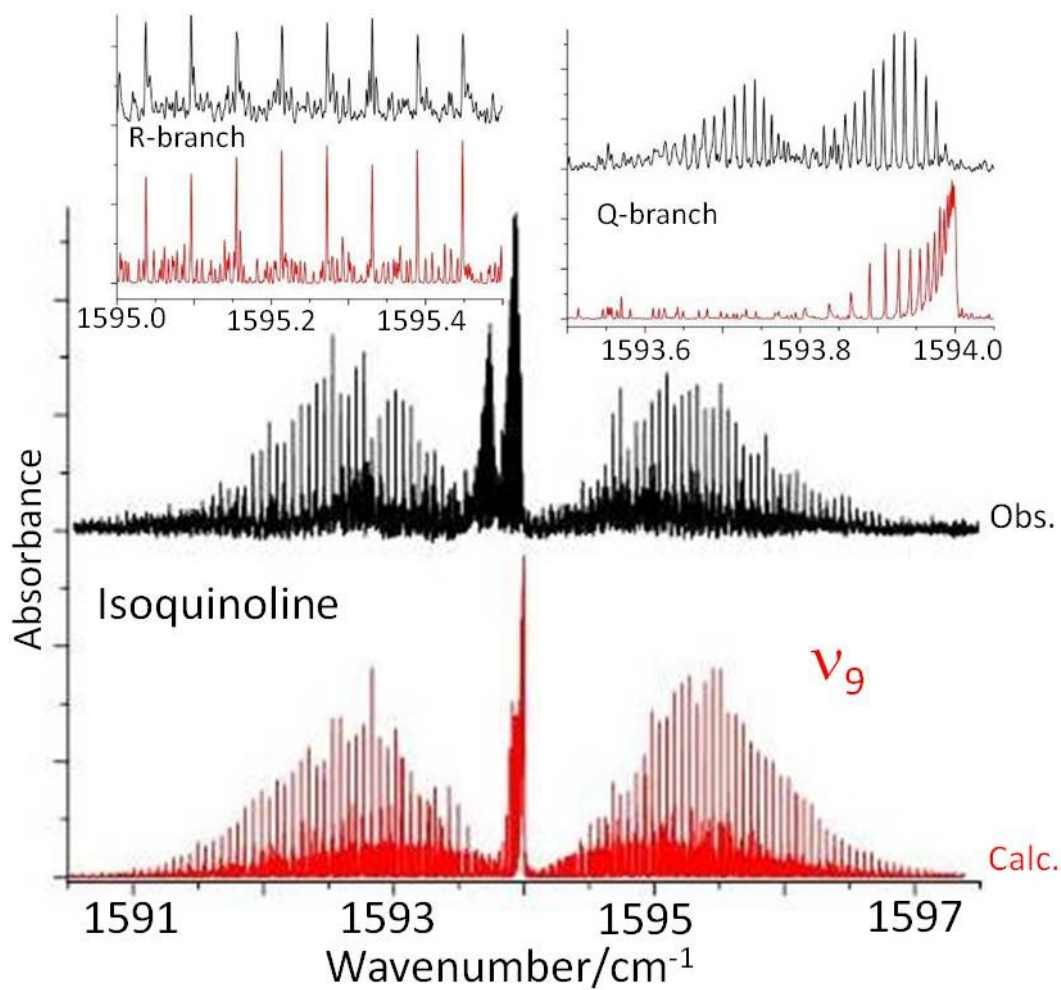

Fig. S1: Overall view of the  $\nu_9$  band of isoquinoline: in black, the SPIRALES spectrum; in red, the  $\nu_9$  band simulated at  $T_{\text{rot}} = 35(5)$  K using a Gaussian line shape of  $0.0017 \text{ cm}^{-1}$  FWHM. Two insets display in the R-branch a good agreement between (obs-calc)  $\nu_9$  spectra, while the observed structured Q-branch split is not reproduced by the simulation.
